# Supplementary material for: Visible-Light Activated Titania and Its Application to Photoelectrocatalytic Hydrogen Peroxide Production
Source: PubMed Central journal article supplement (PMC6947256; doi:10.3390/ma12244238), 2019-12-17
Supplement: materials-12-04238-s001.pdf [file materials-12-04238-s001.pdf]

Supporting Information

# Visible-Light Activated Titania and its Application to Photoelectrocatalytic Hydrogen Peroxide Production

Tatiana Santos Andrade, Ioannis Papagiannis, Vassilios Dracopoulos, Márcio César Pereira and Panagiotis Lianos

## Determination of aqueous hydrogen peroxide

The quantity of the photoelectrocatalytically produced hydrogen peroxide can be monitored by the following procedure. First, it is necessary to make a standard solution of about 200 mg/L of aqueous H<sub>2</sub>O<sub>2</sub>. This concentration fits the spectroscopy data as it will be explained below. For this purpose, we used commercial 30% aqueous H<sub>2</sub>O<sub>2</sub>. This product was diluted 2000 times and the quantity of H<sub>2</sub>O<sub>2</sub> in the diluted sample was determined by potassium permanganate titration. More specifically, the commercial product was first diluted 100 times. Then in a conic flask containing water acidified with H<sub>2</sub>SO<sub>4</sub> (about 5 ml of sulfuric acid added to 150 ml of water), we added 7.5 ml of the diluted sample. This approximately makes a 2000 times dilution of the original sample. Then a solution of 20 mM potassium permanganate was added dropwise under stirring until a persistent pink color was obtained. The concentration of hydrogen peroxide in the conic flask was determined by the following formula

$$C_{H_2O_2} = 2.5C_{per} \frac{v}{V + v}$$

where  $C_{per}$  is the concentration of the added permanganate solution (20 mM in the present case),  $v$  its volume and  $V$  is the volume of the solution before permanganate addition. The multiplication factor 2.5 comes from the well-known reaction scheme

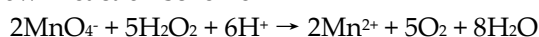

which relates 2 permanganate molecules with 5 hydrogen peroxide molecules. The above titration allowed us to determine the exact concentration of hydrogen peroxide in the diluted solution and thus allowed us to make a standard aqueous H<sub>2</sub>O<sub>2</sub> solution of 200 mg/L. In other words, permanganate titration was used in order to determine H<sub>2</sub>O<sub>2</sub> concentration in the original commercial sample and thus safely prepare a 200 mg/L standard aqueous H<sub>2</sub>O<sub>2</sub> solution.

The next step was to make a calibration curve with the help of potassium titanium oxalate (PTO). For this purpose and by following literature suggestions, a second standard aqueous solution was prepared, containing 25 mM PTO and 1M H<sub>2</sub>SO<sub>4</sub>. In 1 cm cuvette, we mixed 1 ml of the standard PTO solution with 0.2, 0.4, 0.6, 0.8 or 1.0 ml of the standard H<sub>2</sub>O<sub>2</sub> solution. The mixture was completed by adding water so as the total volume of the water mixture to be always 2 ml. The mixture became yellow after mixing the components and gave a UV-Vis absorbance, which peaked at 400 nm. The absorbance was related with the nominal H<sub>2</sub>O<sub>2</sub> concentration and produced the diagram of **Figure S1**. It is seen that with a solution of 200 mg/L H<sub>2</sub>O<sub>2</sub>, the corresponding absorbance remained in the range of accurate measurement by a UV-Vis spectrophotometer and this is the reason that this concentration was chosen as a standard. For the same reason, 25 mM of PTO was also chosen as a standard.

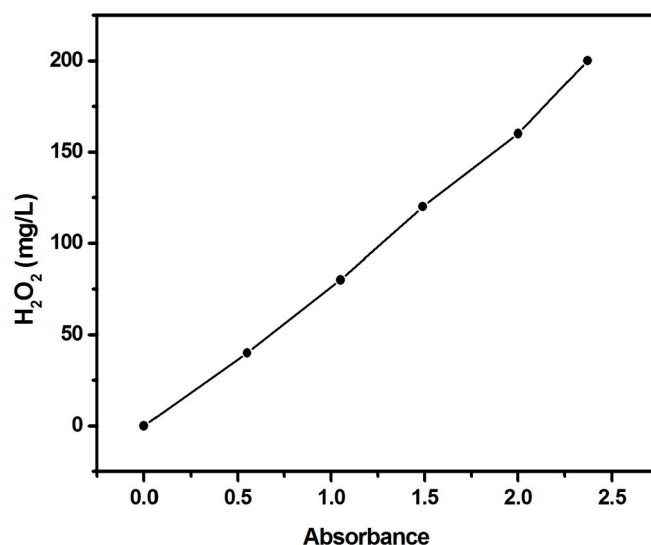

**Figure S1.** Nominal H<sub>2</sub>O<sub>2</sub> concentration as a function of light absorbance at 400 nm. Each sample was made by mixing the same PTO solution with H<sub>2</sub>O<sub>2</sub> solutions of various concentrations.

Once the calibration curve is made, we are ready to determine H<sub>2</sub>O<sub>2</sub> concentration in any given sample. 1 ml of the sample is mixed with 1 ml of PTO standard solution and the corresponding hydrogen peroxide concentration is obtained by relating the obtained absorbance with the above diagram. The approximate H<sub>2</sub>O<sub>2</sub> concentration can be monitored by using hydrogen peroxide detection strips (Quantifix). If the strip indicates a H<sub>2</sub>O<sub>2</sub> concentration larger than 200 mg/L, the sample can be accordingly diluted. Always the quantity of the diluted sample should be 1 ml and it should be mixed with 1 ml of the standard PTO solution.

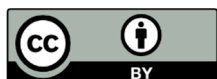

© 2019 by the authors. Submitted for possible open access publication under the terms and conditions of the Creative Commons Attribution (CC BY) license (<http://creativecommons.org/licenses/by/4.0/>).
